# Supplementary material for: Current Challenges of Streptococcus Infection and Effective Molecular, Cellular, and Environmental Control Methods in Aquaculture
Source: PubMed Central journal article supplement — Mol Cells. 2018 May 10;41(6):495–505. doi: 10.14348/molcells.2018.2154 (PMC6030242; doi:10.14348/molcells.2018.2154), 2018-05-10
Supplement: molce-41-6-495-suppl.pdf [file molce-41-6-495-suppl.pdf]

**Supplementary figure 1:** Number of streptococcus isolates / strains affecting aquaculture, reported based on 16S rDNA sequences in NCBI database

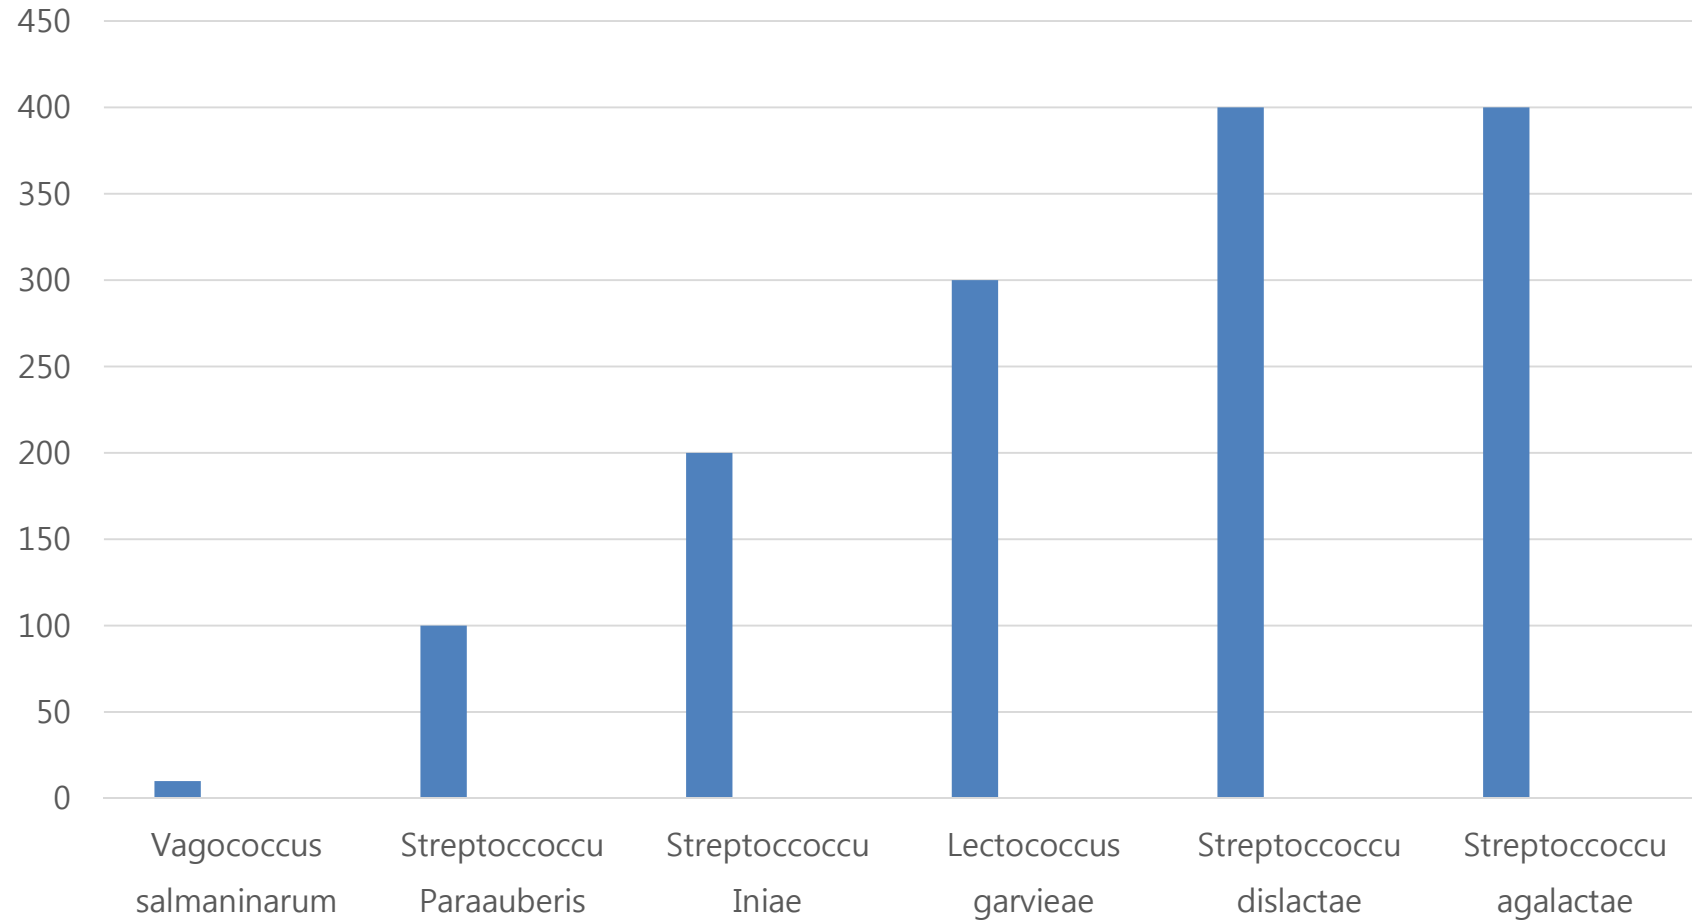

**S.Table 1: Number of streptococcus isolates / strains affecting aquaculture, reported based on 16S rDNA sequences in NCBI database**

| Particular               | Number of isolates / strains (approximate) |
|--------------------------|--------------------------------------------|
| Vagococcus salmaninarum  | 1-10                                       |
| Streptococcu Paraauberis | 10-100                                     |
| Streptococcu Iniae       | 100-200                                    |
| Lectococcus garvieae     | 200-300                                    |
| Streptococcu dislactae   | >400                                       |
| Streptococcu agalactae   | >400                                       |
